# Supplementary material
Source: Springer Nature journal article supplement (https://www.springermedizin.de/resource/supplementary/12963_2009_94_MOESM1_ESM.PDF/9572714)
Supplement: MOESM1 [file 9572714]

# Deaths from heart failure: Using coarsened exact matching to correct cause of death statistics

*Stevens GA, King G, and Shibuya K.*

Table S1. Redistribution algorithm for the US, disaggregated by demographic groups. HS: high school.

|                                              | Sex   |         | Death location          |           | Education    |             |                  | Race  |       |       | Hispanic status |              | Overall |
|----------------------------------------------|-------|---------|-------------------------|-----------|--------------|-------------|------------------|-------|-------|-------|-----------------|--------------|---------|
|                                              | Males | Females | In a hospital or clinic | Elsewhere | Less than HS | At least HS | At least college | White | Black | Other | Hispanic        | Non-hispanic |         |
| Lower respiratory infections                 | 1%    | 2%      | 2%                      | 1%        | 2%           | 1%          | 1%               | 1%    | 1%    | 2%    | 1%              | 1%           | 1%      |
| Diabetes                                     | 6%    | 6%      | 6%                      | 6%        | 6%           | 6%          | 5%               | 6%    | 9%    | 8%    | 11%             | 6%           | 6%      |
| Cancers                                      | 5%    | 4%      | 4%                      | 5%        | 4%           | 4%          | 4%               | 4%    | 6%    | 4%    | 4%              | 4%           | 4%      |
| Ischemic heart disease                       | 55%   | 51%     | 53%                     | 51%       | 53%          | 53%         | 54%              | 54%   | 41%   | 50%   | 51%             | 53%          | 53%     |
| Cerebrovascular disease                      | 1%    | 2%      | 2%                      | 1%        | 2%           | 2%          | 2%               | 2%    | 3%    | 2%    | 2%              | 2%           | 2%      |
| Hypertensive heart disease                   | 5%    | 8%      | 6%                      | 8%        | 7%           | 7%          | 7%               | 6%    | 14%   | 8%    | 8%              | 7%           | 7%      |
| Cardiomyopathy                               | 6%    | 4%      | 4%                      | 5%        | 4%           | 5%          | 5%               | 4%    | 8%    | 5%    | 5%              | 4%           | 4%      |
| Other cardiovascular diseases                | 8%    | 12%     | 10%                     | 10%       | 9%           | 11%         | 12%              | 11%   | 7%    | 9%    | 7%              | 10%          | 10%     |
| Chronic obstructive pulmonary disease (COPD) | 5%    | 4%      | 5%                      | 5%        | 5%           | 5%          | 3%               | 5%    | 3%    | 4%    | 3%              | 5%           | 5%      |
| Digestive diseases                           | 1%    | 1%      | 1%                      | 1%        | 1%           | 1%          | 1%               | 1%    | 1%    | 1%    | 2%              | 1%           | 1%      |
| Other diseases                               | 6%    | 7%      | 7%                      | 6%        | 7%           | 6%          | 7%               | 6%    | 8%    | 6%    | 7%              | 7%           | 7%      |

Table S2. Redistribution algorithm generated for Mexico, disaggregated by demographic groups.

| Matched cause                                | Sex   |         | Place of death |                     | Education        |                     |                       | Health Insurance |                         |                        | Overall |
|----------------------------------------------|-------|---------|----------------|---------------------|------------------|---------------------|-----------------------|------------------|-------------------------|------------------------|---------|
|                                              | Males | Females | Other          | Hospital/<br>clinic | Up to<br>Primary | At least<br>Primary | At least<br>Secondary | IMSS             | Other<br>private/public | Seguro<br>popular/none |         |
| Lower respiratory infections                 | 3%    | 3%      | 2%             | 3%                  | 3%               | 2%                  | 2%                    | 2%               | 2%                      | 3%                     | 3%      |
| Diabetes                                     | 11%   | 15%     | 11%            | 18%                 | 12%              | 18%                 | 14%                   | 17%              | 17%                     | 11%                    | 13%     |
| Cancers                                      | 6%    | 5%      | 6%             | 5%                  | 5%               | 7%                  | 10%                   | 7%               | 8%                      | 5%                     | 6%      |
| Ischemic heart disease                       | 27%   | 26%     | 27%            | 24%                 | 26%              | 26%                 | 30%                   | 28%              | 26%                     | 25%                    | 26%     |
| Cerebrovascular disease                      | 3%    | 3%      | 3%             | 2%                  | 3%               | 2%                  | 2%                    | 2%               | 3%                      | 3%                     | 3%      |
| Hypertensive heart disease                   | 14%   | 18%     | 17%            | 13%                 | 17%              | 15%                 | 12%                   | 15%              | 15%                     | 17%                    | 16%     |
| Cardiomyopathy                               | 1%    | 1%      | 0%             | 2%                  | 1%               | 1%                  | 2%                    | 1%               | 1%                      | 1%                     | 1%      |
| Other cardiovascular diseases                | 8%    | 8%      | 8%             | 8%                  | 8%               | 7%                  | 9%                    | 7%               | 7%                      | 9%                     | 8%      |
| Chronic obstructive pulmonary disease (COPD) | 13%   | 10%     | 11%            | 12%                 | 12%              | 8%                  | 8%                    | 11%              | 11%                     | 12%                    | 11%     |
| Digestive diseases                           | 6%    | 3%      | 4%             | 5%                  | 4%               | 4%                  | 4%                    | 3%               | 3%                      | 4%                     | 4%      |
| Other diseases                               | 10%   | 9%      | 10%            | 8%                  | 9%               | 9%                  | 8%                    | 7%               | 7%                      | 11%                    | 9%      |

Table S3. Redistribution algorithm generated for Brazil, disaggregated by demographic groups.

|                                              | Sex   |         | Place of death |                 | Education |               |                   | Overall |
|----------------------------------------------|-------|---------|----------------|-----------------|-----------|---------------|-------------------|---------|
|                                              | Males | Females | Other          | Hospital/clinic | None      | Up to 7 years | More than 7 years |         |
| Matched cause                                |       |         |                |                 |           |               |                   |         |
| Lower respiratory infections                 | 3%    | 3%      | 1%             | 3%              | 3%        | 3%            | 2%                | 3%      |
| Diabetes                                     | 7%    | 11%     | 8%             | 9%              | 9%        | 9%            | 9%                | 9%      |
| Cancers                                      | 4%    | 3%      | 3%             | 3%              | 3%        | 3%            | 4%                | 3%      |
| Ischemic heart disease                       | 23%   | 21%     | 25%            | 21%             | 18%       | 23%           | 31%               | 22%     |
| Cerebrovascular disease                      | 4%    | 4%      | 5%             | 4%              | 5%        | 4%            | 3%                | 4%      |
| Hypertensive heart disease                   | 21%   | 24%     | 30%            | 20%             | 27%       | 21%           | 15%               | 23%     |
| Cardiomyopathy                               | 10%   | 9%      | 7%             | 10%             | 7%        | 10%           | 11%               | 9%      |
| Other cardiovascular diseases                | 5%    | 6%      | 3%             | 6%              | 3%        | 6%            | 9%                | 5%      |
| Chronic obstructive pulmonary disease (COPD) | 10%   | 8%      | 8%             | 9%              | 10%       | 9%            | 5%                | 9%      |
| Digestive diseases                           | 3%    | 2%      | 1%             | 2%              | 2%        | 2%            | 2%                | 2%      |
| Other diseases                               | 11%   | 10%     | 9%             | 11%             | 11%       | 10%           | 9%                | 11%     |

Table S4. Redistribution algorithm for specified heart failure (congestive and left ventricular, I50.0 and I50.1) and for unspecified heart failure (I50.9), base case. HF: Heart Failure.

|                                              | USA                            |                        | Mexico                         |                        | Brazil                         |                        |
|----------------------------------------------|--------------------------------|------------------------|--------------------------------|------------------------|--------------------------------|------------------------|
|                                              | Specified HF (I50.0 and I50.1) | Unspecified HF (I50.9) | Specified HF (I50.0 and I50.1) | Unspecified HF (I50.9) | Specified HF (I50.0 and I50.1) | Unspecified HF (I50.9) |
| Distribution of heart failure deaths         | 93%                            | 7%                     | 47%                            | 53%                    | 62%                            | 38%                    |
| Lower respiratory infections                 | 1%                             | 2%                     | 2%                             | 3%                     | 3%                             | 3%                     |
| Diabetes                                     | 6%                             | 5%                     | 14%                            | 12%                    | 9%                             | 9%                     |
| Cancers                                      | 4%                             | 9%                     | 4%                             | 6%                     | 2%                             | 4%                     |
| Ischemic heart disease                       | 53%                            | 46%                    | 25%                            | 27%                    | 20%                            | 24%                    |
| Cerebrovascular disease                      | 2%                             | 3%                     | 3%                             | 3%                     | 4%                             | 5%                     |
| Hypertensive heart disease                   | 7%                             | 6%                     | 17%                            | 16%                    | 25%                            | 20%                    |
| Cardiomyopathy                               | 5%                             | 4%                     | 1%                             | 1%                     | 11%                            | 8%                     |
| Other cardiovascular diseases                | 10%                            | 9%                     | 9%                             | 8%                     | 5%                             | 6%                     |
| Chronic obstructive pulmonary disease (COPD) | 5%                             | 4%                     | 13%                            | 10%                    | 9%                             | 8%                     |
| Digestive diseases                           | 1%                             | 3%                     | 4%                             | 4%                     | 2%                             | 2%                     |
| Other diseases                               | 6%                             | 10%                    | 8%                             | 10%                    | 10%                            | 11%                    |
